# Supplementary material for: How Many People Experience Unsafe Medical Care in Thailand, and How Much Does It Cost under Universal Coverage Scheme?
Source: MDPI journal article supplement (doi:10.3390/healthcare11081121), 2023-04-13
Supplement: s1 [file s1]

**Table S1.** ICD-10 codes for patient safety indicators.

| ICD-10 codes | Descriptions                                                                                                                                        | Average number of medical harms between 2016-2020 (times) |
|--------------|-----------------------------------------------------------------------------------------------------------------------------------------------------|-----------------------------------------------------------|
| A02          | Salmonella enteritis                                                                                                                                | 3,159                                                     |
| A04          | Other bacterial intestinal infections                                                                                                               | 16,169                                                    |
| A41          | Other sepsis                                                                                                                                        | 109,145                                                   |
| B95          | Streptococcus and staphylococcus as the cause of diseases classified to other chapters                                                              | 8,863                                                     |
| B96          | Other specified bacterial agents as the cause of diseases classified to other chapters                                                              | 55,260                                                    |
| B97          | Viral agents as the cause of diseases classified to other chapters                                                                                  | 2,231                                                     |
| E15          | Nondiabetic hypoglycaemic coma<br>(Incl. Drug-induced insulin coma in nondiabetic, Hyperinsulinism with hypoglycaemic coma, Hypoglycaemic coma NOS) | 5,533                                                     |
| E16.0        | Drug-induced hypoglycaemia without coma                                                                                                             | 8,507                                                     |
| E27.3        | Drug-induced adrenocortical insufficiency                                                                                                           | 318                                                       |
| E89          | Postprocedural endocrine and metabolic disorders, not elsewhere classified                                                                          | 2,241                                                     |
| G97          | Postprocedural disorders of nervous system, not elsewhere classified                                                                                | 316                                                       |
| H59          | Postprocedural disorders of eye and adnexa, not elsewhere classified                                                                                | 1,998                                                     |
| I26          | Pulmonary embolism                                                                                                                                  | 5,565                                                     |
| I82          | Other venous embolism and thrombosis                                                                                                                | 2,100                                                     |
| J95          | Postprocedural respiratory disorders, not elsewhere classified                                                                                      | 15,762                                                    |
| K91          | Postprocedural disorders of digestive system, not elsewhere classified                                                                              | 2,335                                                     |
| L89          | Decubitus ulcer and pressure area                                                                                                                   | 40,839                                                    |
| M96          | Postprocedural musculoskeletal disorders, not elsewhere classified                                                                                  | 1,217                                                     |
| N99          | Postprocedural disorders of genitourinary system, not elsewhere classified                                                                          | 710                                                       |
| O29          | Complications of anaesthesia during pregnancy                                                                                                       | 15                                                        |
| O70          | Perineal laceration during delivery                                                                                                                 | 16,123                                                    |
| O71          | Other obstetric trauma                                                                                                                              | 1,823                                                     |
| O74          | Complications of anaesthesia during labour and delivery                                                                                             | 39                                                        |
| O75          | Other complications of labour and delivery, not elsewhere classified                                                                                | 3,948                                                     |
| O85          | Puerperal sepsis                                                                                                                                    | 663                                                       |
| O86          | Other puerperal infections                                                                                                                          | 1,623                                                     |
| O89          | Complications of anaesthesia during the puerperium                                                                                                  | 34                                                        |
| O90          | Complications of the puerperium, not elsewhere classified                                                                                           | 851                                                       |
| P03          | Fetus and newborn affected by other complications of labour and delivery                                                                            | 12,197                                                    |
| P12          | Birth injury to scalp                                                                                                                               | 6,921                                                     |
| P13          | Birth injury to skeleton                                                                                                                            | 460                                                       |
| P14          | Birth injury to peripheral nervous system                                                                                                           | 350                                                       |
| P15          | Other birth injuries                                                                                                                                | 560                                                       |
| T36          | Poisoning by systemic antibiotics                                                                                                                   | 2,931                                                     |
| T37          | Poisoning by other systemic anti-infectives and antiparasitics                                                                                      | 585                                                       |
| T38          | Poisoning by hormones and their synthetic substitutes and antagonists, not elsewhere classified                                                     | 470                                                       |
| T39          | Poisoning by nonopioid analgesics, antipyretics and antirheumatics                                                                                  | 5,167                                                     |
| T41          | Poisoning by anaesthetics and therapeutic gases                                                                                                     | 48                                                        |
| T42          | Poisoning by antiepileptic, sedative-hypnotic and antiparkinsonism drugs                                                                            | 3,111                                                     |
| T42.7        | Antiepileptic and sedative-hypnotic drugs, unspecified                                                                                              | 348                                                       |
| T43          | Poisoning by psychotropic drugs, not elsewhere classified                                                                                           | 2,521                                                     |
| T44          | Poisoning by drugs primarily affecting the autonomic nervous system                                                                                 | 587                                                       |
| T45          | Poisoning by primarily systemic and haematological agents, not elsewhere classified                                                                 | 5,580                                                     |
| T45.5        | Anticoagulants                                                                                                                                      | 3,821                                                     |
| T45.7        | Anticoagulant antagonists, vitamin K and other coagulants                                                                                           | 17                                                        |

| ICD-10 codes | Descriptions                                                                                                                                                                                                                                                                                                            | Average number of medical harms between 2016-2020 (times) |
|--------------|-------------------------------------------------------------------------------------------------------------------------------------------------------------------------------------------------------------------------------------------------------------------------------------------------------------------------|-----------------------------------------------------------|
| T46          | Poisoning by agents primarily affecting the cardiovascular system                                                                                                                                                                                                                                                       | 632                                                       |
| T47          | Poisoning by agents primarily affecting the gastrointestinal system                                                                                                                                                                                                                                                     | 193                                                       |
| T48          | Poisoning by agents primarily acting on smooth and skeletal muscles and the respiratory system                                                                                                                                                                                                                          | 272                                                       |
| T49          | Poisoning by topical agents primarily affecting skin and mucous membrane and by ophthalmological, otorhinolaryngological and dental drugs                                                                                                                                                                               | 565                                                       |
| T50          | Poisoning by diuretics and other and unspecified drugs, medicaments and biological substances                                                                                                                                                                                                                           | 2,801                                                     |
| T80          | Complications following infusion, transfusion and therapeutic injection                                                                                                                                                                                                                                                 | 4,350                                                     |
| T81          | Complications of procedures, not elsewhere classified (ex. Haemorrhage and haematoma complicating a procedure, Shock during or resulting from a procedure, Disruption of operation wound, Infection following a procedure, Foreign body accidentally left in body cavity or operation wound following a procedure etc.) | 34,356                                                    |
| T82          | Complications of cardiac and vascular prosthetic devices, implants and grafts                                                                                                                                                                                                                                           | 5,969                                                     |
| T83          | Complications of genitourinary prosthetic devices, implants and grafts                                                                                                                                                                                                                                                  | 2,036                                                     |
| T84          | Complications of internal orthopaedic prosthetic devices, implants and grafts                                                                                                                                                                                                                                           | 6,385                                                     |
| T85          | Complications of other internal prosthetic devices, implants and grafts                                                                                                                                                                                                                                                 | 16,015                                                    |
| T87          | Complications peculiar to reattachment and amputation                                                                                                                                                                                                                                                                   | 1,014                                                     |
| T88          | Other complications of surgical and medical care, not elsewhere classified                                                                                                                                                                                                                                              | 6,762                                                     |

**Table S2.** Inpatient category of Thailand's consumer price index (CPI).

| Year             | CPI    |
|------------------|--------|
| 2016             | 99.69  |
| 2017             | 99.92  |
| 2018             | 99.99  |
| 2019 (base year) | 100.00 |
| 2020             | 100.05 |

**Table S3.** Characteristics of inpatient visit.

|                                                          | 2016              |       | 2017              |       | 2018              |       | 2019              |       | 2020              |       |
|----------------------------------------------------------|-------------------|-------|-------------------|-------|-------------------|-------|-------------------|-------|-------------------|-------|
|                                                          | Number            | %     |
| <b>Total visits</b>                                      | 6,056,500         | 100   | 6,006,660         | 100   | 6,264,661         | 100   | 6,366,463         | 100   | 5,758,165         | 100   |
| <b>Age (years)</b>                                       |                   |       |                   |       |                   |       |                   |       |                   |       |
| mean $\pm$ SD                                            | 39.14 $\pm$ 28.33 |       | 40.17 $\pm$ 28.21 |       | 40.11 $\pm$ 28.35 |       | 41.11 $\pm$ 28.23 |       | 43.09 $\pm$ 27.67 |       |
| <b>Age group</b>                                         |                   |       |                   |       |                   |       |                   |       |                   |       |
| 0-14                                                     | 1,677,053         | 27.69 | 1,575,436         | 26.23 | 1,691,317         | 27.00 | 1,646,175         | 25.86 | 1,283,621         | 22.29 |
| 15-59                                                    | 2,483,391         | 41.00 | 2,483,816         | 41.35 | 2,530,714         | 40.40 | 2,562,273         | 40.25 | 2,404,989         | 41.77 |
| $\geq$ 60                                                | 1,896,056         | 31.31 | 1,947,408         | 32.42 | 2,042,630         | 32.61 | 2,158,015         | 33.90 | 2,069,555         | 35.94 |
| <b>Sex</b>                                               |                   |       |                   |       |                   |       |                   |       |                   |       |
| Female                                                   | 2,881,668         | 47.58 | 2,873,017         | 47.83 | 3,024,824         | 48.28 | 3,088,615         | 48.51 | 2,790,766         | 48.47 |
| Male                                                     | 3,174,832         | 52.42 | 3,133,643         | 52.17 | 3,239,837         | 51.72 | 3,277,848         | 51.49 | 2,967,399         | 51.53 |
| <b>Hospital types</b>                                    |                   |       |                   |       |                   |       |                   |       |                   |       |
| Center hospital                                          | 1,328,500         | 21.94 | 1,332,033         | 22.18 | 1,366,387         | 21.81 | 1,380,172         | 21.68 | 1,281,493         | 22.26 |
| General hospital                                         | 1,392,396         | 22.99 | 1,406,682         | 23.42 | 1,464,010         | 23.37 | 1,479,134         | 23.23 | 1,363,341         | 23.68 |
| Community hospital                                       | 2,627,680         | 43.39 | 2,597,254         | 43.24 | 2,767,683         | 44.18 | 2,843,502         | 44.66 | 2,511,310         | 43.61 |
| Private hospital                                         | 201,867           | 3.33  | 175,249           | 2.92  | 165,714           | 2.65  | 162,042           | 2.55  | 132,336           | 2.30  |
| Others (ex. medical university hospitals, health center) | 506,057           | 8.36  | 495,442           | 8.25  | 500,867           | 8.00  | 501,613           | 7.88  | 469,685           | 8.16  |
